# Supplementary material for: Gene looping facilitates TFIIH kinase-mediated termination of transcription
Source: PubMed Central journal article supplement (PMC4541409; doi:10.1038/srep12586), 2015-08-19
Supplement: srep12586-s1.pdf [file srep12586-s1.pdf]

**Gene looping facilitates TFIIH kinase-mediated termination of transcription**

Scott Medler<sup>1</sup> and Athar Ansari<sup>1\*</sup>

<sup>1</sup>Department of Biological Science, Wayne State University, 5047 Gullen Mall  
Detroit, MI 48202

\*To whom correspondence should be addressed. Phone: (313) 577-9251; Fax: (313) 571-6891;  
E-MAIL: [ansari@biology.biosci.wayne.edu](mailto:ansari@biology.biosci.wayne.edu)

**Table S1: Yeast Strains**

|        |                                                                                                                                                            |                          |
|--------|------------------------------------------------------------------------------------------------------------------------------------------------------------|--------------------------|
| BY4733 | MATa his3Δ200 trp1Δ63 leu2Δ0 met15Δ0 ura3Δ0                                                                                                                | Hampsey lab              |
| SAM89  | MATa his3Δ200 trp1Δ63 leu2Δ0 met15Δ0 ura3Δ0, KIN28-TAP, URA+                                                                                               | This study               |
| SAM93  | MATa his3Δ200 trp1Δ63 leu2Δ0 met15Δ0 ura3Δ0, KIN28-TAP, URA+, RNA15-13xMyc, TRP+                                                                           | This study               |
| SAM51  | MATa his3Δ200 trp1Δ63 leu2Δ0 met15Δ0 ura3Δ0, RNA15-13xMyc, TRP+                                                                                            | El Kaderi et al, 2009(1) |
| SAM94  | MATa his3Δ200 trp1Δ63 leu2Δ0 met15Δ0 ura3Δ0, KIN28-TAP, URA+, SSU72-13xMyc, TRP+                                                                           | This study               |
| SAM103 | MATa his3Δ200 trp1Δ63 leu2Δ0 met15Δ0 ura3Δ0, SSU72-13xMyc, TRP+                                                                                            | This study               |
| yFR763 | MATα, ade::higG, his3Δ200, leu2Δ0, lys2Δ0,met15Δ0,trp1Δ63,ura3Δ0 kin28::kin28-L83G [pSH579, ARS CEN URA3 kin28-L83G]                                       | Liu Y et al, 2004(2)     |
| SAM99  | MATα, ade::higG, his3Δ200, leu2Δ0, lys2Δ0,met15Δ0,trp1Δ63,ura3Δ0 kin28::kin28-L83G [pSH579, ARS CEN URA3 kin28-L83G] Kin28as-TAP, TRP+                     | This study               |
| SAM101 | MATα, ade::higG, his3Δ200, leu2Δ0, lys2Δ0,met15Δ0,trp1Δ63,ura3Δ0 kin28::kin28-L83G [pSH579, ARS CEN URA3 kin28-L83G] Kin28as-TAP, TRP+, RNA15-13xMyc, HIS+ | This study               |
| SAM102 | MATα, ade::higG, his3Δ200, leu2Δ0, lys2Δ0,met15Δ0,trp1Δ63,ura3Δ0 kin28::kin28-L83G [pSH579, ARS CEN URA3 kin28-L83G] Kin28as-TAP, TRP+, SSU72-13xMyc, HIS+ | This study               |
| SAM104 | MATα, ade::higG, his3Δ200, leu2Δ0, lys2Δ0,met15Δ0,trp1Δ63,ura3Δ0 kin28::kin28-L83G [pSH579, ARS CEN URA3 kin28-L83G] RNA15-13xMyc, HIS+                    | This study               |
| SAM105 | MATα, ade::higG, his3Δ200, leu2Δ0, lys2Δ0,met15Δ0,trp1Δ63,ura3Δ0 kin28::kin28-L83G [pSH579, ARS CEN URA3 kin28-L83G] SSU72-13xMyc, HIS+                    | This study               |
| SAM106 | MATα, ade::higG, his3Δ200, leu2Δ0, lys2Δ0,met15Δ0,trp1Δ63,ura3Δ0                                                                                           | This study               |

|     |                                                                                                       |            |
|-----|-------------------------------------------------------------------------------------------------------|------------|
|     | kin28::kin28-L83G [pSH579, ARS CEN URA3 kin28-L83G] RPB4-13xMyc, HIS+                                 |            |
| AS1 | MATa, his3 $\Delta$ 200, trp1 $\Delta$ 63, leu2 $\Delta$ 0, met15 $\Delta$ 0, ura3 $\Delta$ 0, sua7-1 | This study |

**References:**

1. El Kaderi, B., Medler, S., Raghunayakula, S., and Ansari, A. (2009) *J Biol Chem* 284, 25015-25025
2. Liu, Y., Kung, C., Fishburn, J., Ansari, A. Z., Shokat, K. M., and Hahn, S. (2004) *Mol Cell Biol* 24, 1721-1735

**Table S2: Primer Tables**

**cDNA**

| <b>Name</b> | <b>Sequence</b>              |
|-------------|------------------------------|
| Oligo dT    | TTTTTTTTTTTTTTTTTTTTTTTTTTTT |
| 18s         | GACGGAGTTTCACAAGATTACC       |
| CHA1 d1     | GGAAAAAATCAATACTAGCAAATA     |
| CHA1 d2     | CCCCTTTATACAAATTCTGTGC       |
| CHA1 d3     | GCTTTTCTTCACTTAGTAAGGATTAA   |
| CHA1 d4     | CTGGGGTCTTCATTTGTGTCA        |
| CHA1 d5     | GTGCTGGAAATGGCAAACG          |
| CHA1 d6     | CAGCTGAGTAACTAACTCTCATGG     |
| CHA1 d7     | TAGTTTTTAGTACGATTGCATTGTC    |
| ACT1 d1     | ATACGCGCACAAAAGCAGAG         |
| ACT1 d2     | AATTTTCGTAGAAAAGGGAGAGAC     |
| ACT1 d3     | GGTATCAAACGCCGACTC           |
| ACT1 d4     | TTTGC GTAACGTTTGGATGG        |
| ACT1 d5     | CGCATTATTTGTGAAGTATGGTC      |
| ACT1 d6     | AGTGAAGCTCAGGAAATTCAGC       |
| ACT1 d7     | AACTCCTTTACAACAAGGTTTACTC    |
| HXT1 d1     | TTGTTTTAACACCAATATAATATCACC  |
| HXT1 d2     | GTAACACTACTAGATGTTGAAGCAGC   |
| HXT1 d3     | GGTAGCGTGCAATTTCTCGTC        |
| HXT1 d4     | GAACATTTACATGAAGAGGGCTG      |
| HXT1 d5     | CAAATTGATGCGGTAGCGTAG        |
| HXT1 d6     | GGTTTGGGCATTGTTTTTCC         |

|         |                                 |
|---------|---------------------------------|
| HXT1 d7 | GATTCTTCGTGATTCTCGTCG           |
| ASC1 d1 | GAAC TTTATACATATTCTTAGTTAGCAGTC |
| ASC1 d2 | TGTACATATGTATTTTCGCAGCA         |
| ASC1 d3 | GCCAAGGAGACTGAATTTAATG          |
| ASC1 d4 | CTATGGAATGGGGGTTTTAAG           |
| ASC1 d5 | GGTTATGGCAGACATGCCAC            |
| ASC1 d6 | CAAAGTTGATGAGAGTGAAAGAGG        |
| ASC1 d7 | CTCGACCACAGATGGCACC             |

**18s Control-PCR**

| Name  | Sequence                 |
|-------|--------------------------|
| 18s F | GGAATAATAGAATAGGACGTTTGG |
| 18s R | GTAAAGGTCTCGTTCGTTATCG   |

**Gene Specific RT-PCR Primers**

| Name    | Sequence                    |
|---------|-----------------------------|
| CHA1 F  | AATTCAAAGGACGGTAAAAGAT      |
| CHA1 R  | AAGGGATGAACATAAATGGGC       |
| CHA1-TO | CAGTCGTGGTTCCTACAGCG        |
| MET16 F | CATTTGGTTTGACTGGCTTGG       |
| MET16 R | TCGTACTTGTCATCATCTTTCTCC    |
| INO1 F  | GATATCCAGAATTTCAAAGAAGAAAAC |
| INO1 R  | TATTCTGCGGTGAACCATTAATATAG  |
| ACT1 F  | TACTCTTTCTCCACCACTGCTG      |
| ACT1 R  | GATTTCTTTTGCATTCTTTTCG      |
| ACT1-TO | GAAATATTTTCGTGATAAGTGATAGTG |
| MSN5 F  | CAATGCCAATCCAAACAGTG        |

|         |                          |
|---------|--------------------------|
| MSN5 R  | CGCACTATTACACAGCACATTTA  |
| CMP1 F  | AACCGCAGAATAATGAATAAAGTG |
| CMP1 R  | GATATAAGGTTGGGTTCTTTGCT  |
| SPC1 F  | GTGCTCTCGCTACTTTTCTGG    |
| SPC1 R  | CATTGTGCTGTTTCAGAGAACCA  |
| IMD4 F  | ATTGGTATGGGTTCTGGGTC     |
| IMD4 R  | GCCTTCAATCTCTTACCATCC    |
| ASC1 F  | CTTACGCTTTGTCTGCTTCTTG   |
| ASC1 R  | GATGGTCTTGTCACGGGAAC     |
| ASC1-TO | AGATTCGTCGGTCACAAGTCC    |
| GAL10 F | GATCTTCCATACAAAGTTACGGG  |
| GAL10 R | CACAAATCTTGCGTCATAACG    |
| HXT1 F  | ATTTGGTATGAAGCACCACGA    |
| HXT1 R  | GGGCGACCTCAGATATTAGCA    |
| HXT1-TO | ATTTGGTATGAAGCACCACGA    |

**HXT1 ChIP**

| Name   | Sequence                  |
|--------|---------------------------|
| HXT1 P | GCGATGAGATAAGATAAAAAGGGA  |
|        | GATTACCGATTCCCTCTACTTTTGA |
| HXT1 M | ATTTGGTATGAAGCACCACGA     |
|        | GGGCGACCTCAGATATTAGCA     |
| HXT1 T | GGTGGAACGAATGGATGTC       |
|        | TCTTAGTGTTGTAACCCAAATGC   |

**CHA1 ChIP**

| Name    | Sequence                   |
|---------|----------------------------|
| CHA1 P  | GCCCCAGCGGAAATGTAA         |
|         | CATTCATATTTCAAGAAAAATTGTG  |
| CHA1 M  | GCCCAGGTTATCGTGAGTG        |
|         | CACCTCCACCAACGCTGC         |
| CHA1 T  | GGAAGAAGCGTTGGATAGCAT      |
|         | CAGTAGTTTATGCTTTATGCTCG    |
| CHA1 D1 | GCACAGAATTTGTATAAAGGGG     |
|         | GCTTTTCTTCACTTAGTAAGGATTAA |
| CHA1 D2 | GTTCCGTAATAATCTTCCCAGC     |
|         | CTGGGGTCTTCATTTGTGTCA      |

**ASC1 ChIP**

| Name   | Sequence                  |
|--------|---------------------------|
| ASC1 P | GACTGCTCCTTTGGTTTTCC      |
|        | GGTTGACCAGCAGAAGTAGCC     |
| ASC1 M | CGAAAAAGCTGATGATGACTCTG   |
|        | TTGATGTTGGAGTTGTGACCG     |
| ASC1 T | TGGCAAGTTATGACTGCTAACTAAG |
|        | GCCAAGGAGACTGAATTTAATG    |

**ACT1 ChIP**

| Name   | Sequence                   |
|--------|----------------------------|
| ACT1 P | CAAACCTCGCCTCTCTCTCTCC     |
|        | GCAAGCGCTAGAACATACCAG      |
| ACT1 M | CATACCTTCTACAACGAATTGAGAG  |
|        | CTTCATCAAGTAGTCAGTCAAATCTC |

|         |                         |
|---------|-------------------------|
| ACT1 T  | TGGTCCATCTATCGTTCACCA   |
|         | ATAAACTGAAAAGCGATGAAGAG |
| ACT1 D1 | GTTTTGTCTCTCCCTTTTCTACG |
|         | GGTATCAAACGCCGACTC      |
| ACT1 D2 | CCGCCATTAGAATTTGAGTCC   |
|         | TTTGCGTAACGTTTGGATGG    |

**HXT1 CCC**

| Name    | Sequence                  |
|---------|---------------------------|
| HXT1 P  | TCGGGTGTTAAGAAATATTTTGC   |
| HXT1 T  | TTAACAGATAACCGAGTCGATCTC  |
| HXT1 C1 | AATACCACATAGGCGCTATACATAG |
| HXT1 C2 | CGTCTTTTCTTTACTGCTTCACC   |

**CHA1 CCC**

| Name    | Sequence                   |
|---------|----------------------------|
| CHA1 P  | GGAAAATGTTTATACAGTTTTCTCTT |
| CHA1 T  | GGAAAATGTTTATACAGTTTTCTCTT |
| CHA1 C1 | GGAAGAAGCGTTGGATAGCAT      |
| CHA1 C2 | CGTTTTGGATATGTTGATGCTTAC   |

**ACT1 CCC**

| Name    | Sequence                 |
|---------|--------------------------|
| ACT1 P  | CGAGTTTGGTTTCAAACGG      |
| ACT1 T  | CCGCCATTAGAATTTGAGTCC    |
| ACT1 C1 | TGGTCCATCTATCGTTCACCA    |
| ACT1 C2 | AATTTTCGTAGAAAAGGGAGAGAC |



**ASC1 CCC**

| Name    | Sequence                   |
|---------|----------------------------|
| ASC1 P  | GACTGCTCCTTTGGTTTTCC       |
| ASC1 T  | CTTTATTTCCCTTATTGTGGTATTAG |
| ASC1 C1 | ATGCTGTTTCTTTGGCTTGG       |
| ASC1 C2 | TGTACATATGTATTTTCGCAGCA    |

**C-Terminal Tagging Primers**

| Name              | Sequence                                                                    |
|-------------------|-----------------------------------------------------------------------------|
| F2- Myc-RNA15     | CTATTTGGGACTTAAAACAAAAAGCATTAAAGGGGAGAA<br>TTTGGTGCATTTTCGGATCCCCGGGTAAATTA |
| R1- Myc-RNA15     | ATCATTGCGGAACCGCATTTTTTTTTTGTATTTTGCCTCC<br>CTAGTTTCAGAATTCGAGCTCGTTTAAAC   |
| RNA15-My-Diag     | TCCAGGCCGCAAGAAGAG                                                          |
| F2-HA-TFIIB       | TTGCTAATGGTGTAGTGTCTTTGGATAACTTACCGGGCG<br>TTGAAAAGAAACGGATCCCCGGGTAAATTA   |
| R1-HA-TFIIB       | CACGAGTACCCGTGCTTCTTGTTCCCTATAATTTACTGTTT<br>TATCACTTCAGAATTCGAGCTCGTTTAAAC |
| TFIIB-HA-Diag     | CCGATGCAAGTCACTACTTCTG                                                      |
| Myc-tag-Diag      | CAAGTCTTCCTCGGAGATTAGC                                                      |
| HA-tag-Diag       | GGTAGAGGTGTGGTCAATAAGAGC                                                    |
| F2 KIN28-My/HA-   | TCAAAGAATTACCACCACCAAGTGACCCGTCTTCAATAAAAATACGTAACCGG<br>ATCCCCGGGTAAATTA   |
| R1 KIN28-My/HA-   | GATACATCTAATGTCAATAACACAGATTCTACAAATTTTATAAAATCATAGAATT<br>CGAGCTCGTTTAAAC  |
| 5' KIN28-Tag-Diag | CGCCTTAGATTTTATGTGTGGA                                                      |
| F2-SSU72-         | GGCAAAGCTCACATTCTCAACTACCGTCATTATACGCTCCTTCATATTACCGG<br>ATCCCCGGGTAAATTA   |

|                     |                                                                            |
|---------------------|----------------------------------------------------------------------------|
| Myc-                |                                                                            |
| R1-SSU72-Myc-       | ATGAGGGCCGCTTAATGCTTATGCTTTTCTACAGTAATTGACCGTTTTGTGAAT<br>TCGAGCTCGTTTAAAC |
| 5' SSU72-Tag Diag   | ATGATGATGAAAATGCTAAAATTG                                                   |
| 5' TFB4-C-TAP       | GGAAACCAGTTGTTCCAAGGTTGAAAGCCAAAAGAAGGTGACGAAACCATC<br>CATGGAAAAGAGAAG     |
| 3' TFB4-C-TAP       | ATTGTGACGAAGGTTACCTGCTTGAACGGATAATGTTTCATTCTTTCGTTAC<br>GACTCACTATAGGG     |
| TFB4-TAP-DIAG       | AGGACATCATGCTATTTAACAGGG                                                   |
| 5' C-TAP Ssl2       | AGGAACATCATCCATTAATCAGAAAGATGTATTATAAGAATTTGAAGAAGTCCA<br>TGGAAAAGAGAAG    |
| 3' C-TAP Ssl2       | TATGACTGAATAGATTCAAATAGGAAGGTGACAATGAAACCAAGCCTATTAC<br>GACTCACTATAGGG     |
| 5' C-TAP SSL2-Diag  | TTACACATTTACACGGAATGGAG                                                    |
| 5' C-TAP kin28      | TCAAAGAATTACCACCACCAAGTGACCCGTCTTCAATAAAAATACGTAECTCC<br>ATGGAAAAGAGAAG    |
| 3' C-TAP kin28      | GATACATCTAATGTCAATAACACAGATTCTACAAATTTTATAAAATCATA<br>TACGACTCACTATAGGG    |
| 5' C-TAP kin28-Diag | CGAAGTTTCTTCCTTTATGACG                                                     |
| 5' RNA15-TAP-C      | CTATTTGGGACTTAAAACAAAAGCATTAAAGGGGAGAATTTGGTGCATTTTCC<br>ATGGAAAAGAGAAG    |
| 3' RNA15-TAP-C      | ATCATTGCGGAACCGCATTTTTTTTTTGTATTTTTGCCTCCCTAGTTTCA<br>TACGACTCACTATAGGG    |
| 5' TAP-Rna15-D      | TCCAGGCCGCAAGAAGAG                                                         |
| 5' Ssu72-C-TAP      | GGCAAAGCTCACATTCTCAACTACCGTCATTATACGCTCCTTCATATTACTCCA<br>TGGAAAAGAGAAG    |
| 3' Ssu72-C-TAP      | ATGAGGGCCGCTTAATGCTTATGCTTTTCTACAGTAATTGACCGTTTTGTTACG<br>ACTCACTATAGGG    |
| 5' Ssu72-C-TAP-Diag | GTGAAGATTTGATGAATAGAGG                                                     |
| 3' TAP Diag         | GTTGAATTTGTTGTCTACTTTCGG                                                   |

Supplemental Fig. S1

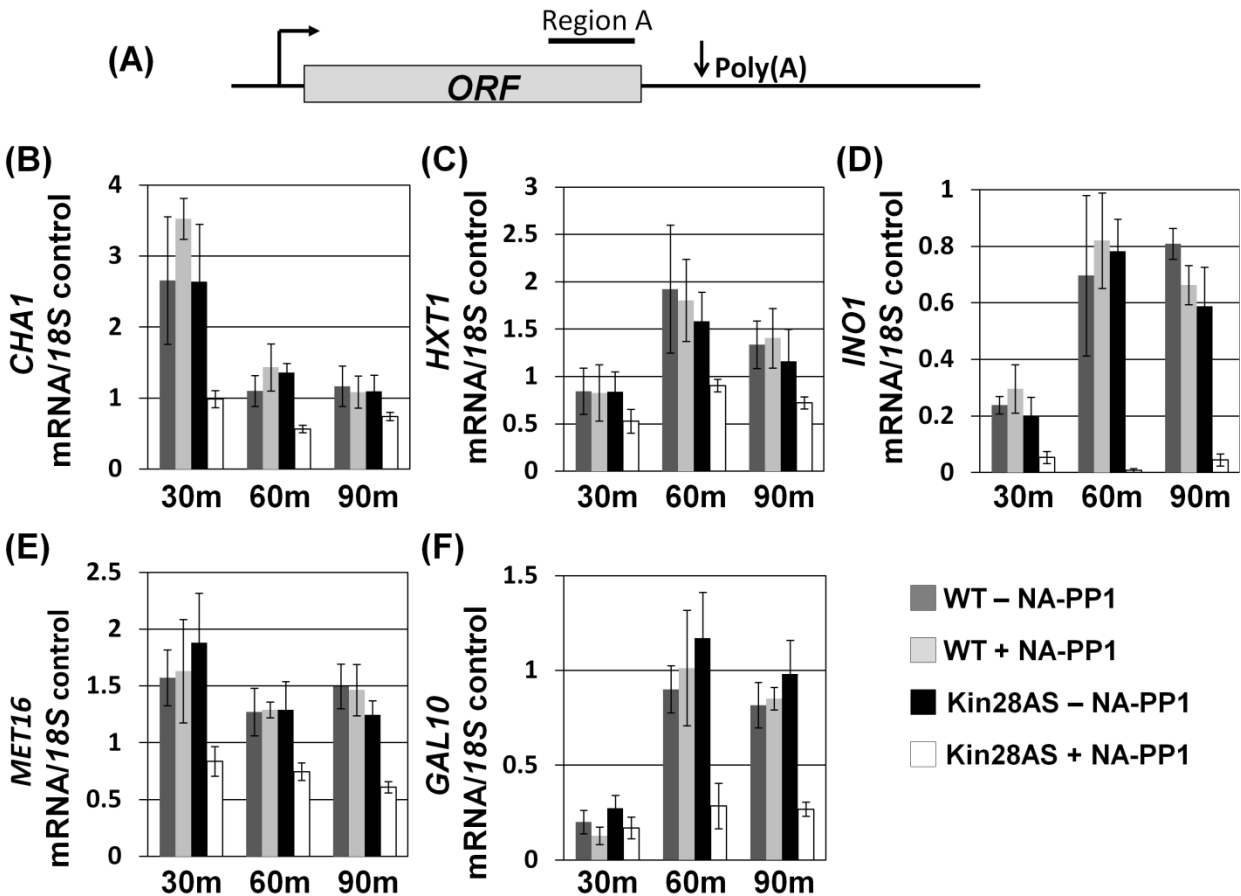

**Figure S1. The steady state mRNA levels of inducible genes are reduced in the absence of Kin28 kinase activity.** A, Schematic depiction of a gene indicating the region of cDNA amplified in the RT-PCR assay. B-F, Quantification of mRNA levels of *CHA1*, *HXT1*, *INO1*, *MET16* and *GAL10* in the wild type and analog-sensitive Kin28 mutant (kin28-as) following induction of transcription. Upon induction, cells were grown with either DMSO (-NA-PP1) or 7  $\mu$ M NA-PP1 (+NA-PP1) for the indicated period of time. The transcript level of 18S was used as the control for the normalization of results. Error bars represent one unit of standard deviation. The results shown here are averages of at least four PCRs from two independent RNA preparations.

## Supplemental Fig. S2

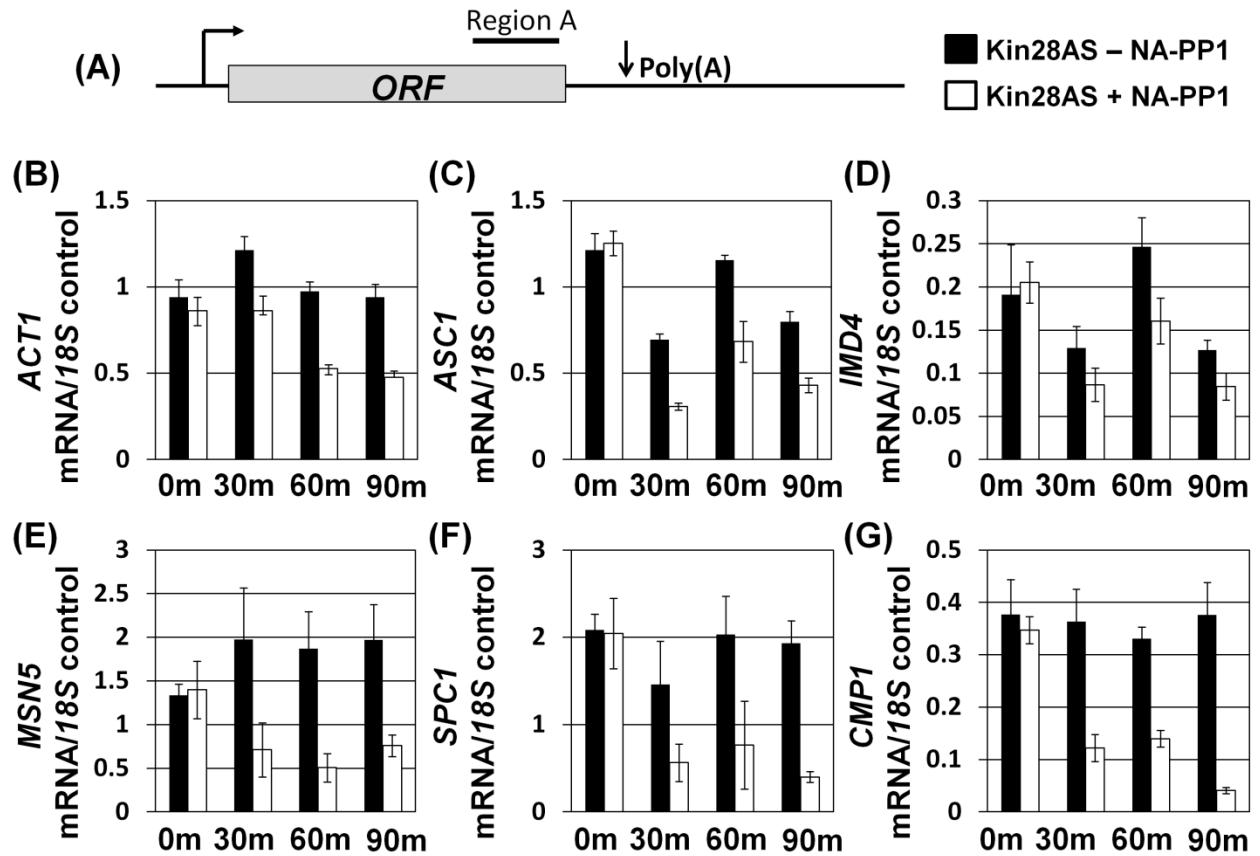

**Figure S2. The steady state mRNA levels of non-inducible genes are reduced in the absence of Kin28 kinase activity.** A, Schematic depiction of a gene indicating the region of cDNA amplified in the RT-PCR assay. B-G, Quantification of mRNA levels of *ACT1*, *ASC1*, *IMD4*, *MSN5*, *SPC1* and *CMP1* genes in the analog-sensitive Kin28 mutant (kin28-as) in the absence of (-NA-PP1) or presence of NA-PP1 (+NA-PP1). The transcript level of 18S was used as the control for normalization of results. Error bars represent one unit of standard deviation. The results shown here are averages of at least four PCRs from two independent RNA preparations.

Supplemental Fig. S3

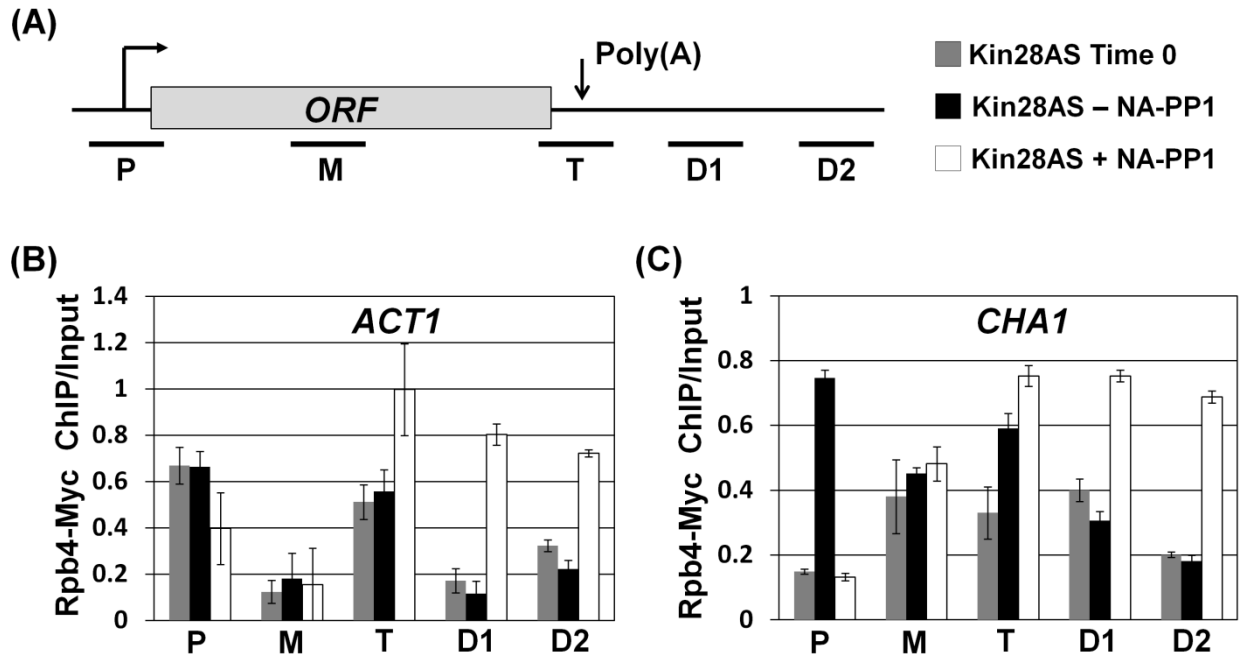

**Figure S3. RNAPII density measured in terms of Rpb4-ChIP showing the readthrough of polymerase beyond the poly(A) site in the absence of Kin28 kinase activity.** A, Schematic depiction of a gene indicating different regions P, M, T, D1 and D2 of a gene PCR amplified in the ChIP assay. B-C, Quantification of Rpb4-ChIP signals in the analog-sensitive Kin28 mutant (kin28-as) in the absence (-NA-PP1) or presence (+NA-PP1) of NA-PP1. Input represents DNA prior to immunoprecipitation. Error bars represent one standard deviation. The results shown here are averages of at least four PCRs from two independent ChIP experiments.

## Supplemental Fig. S4

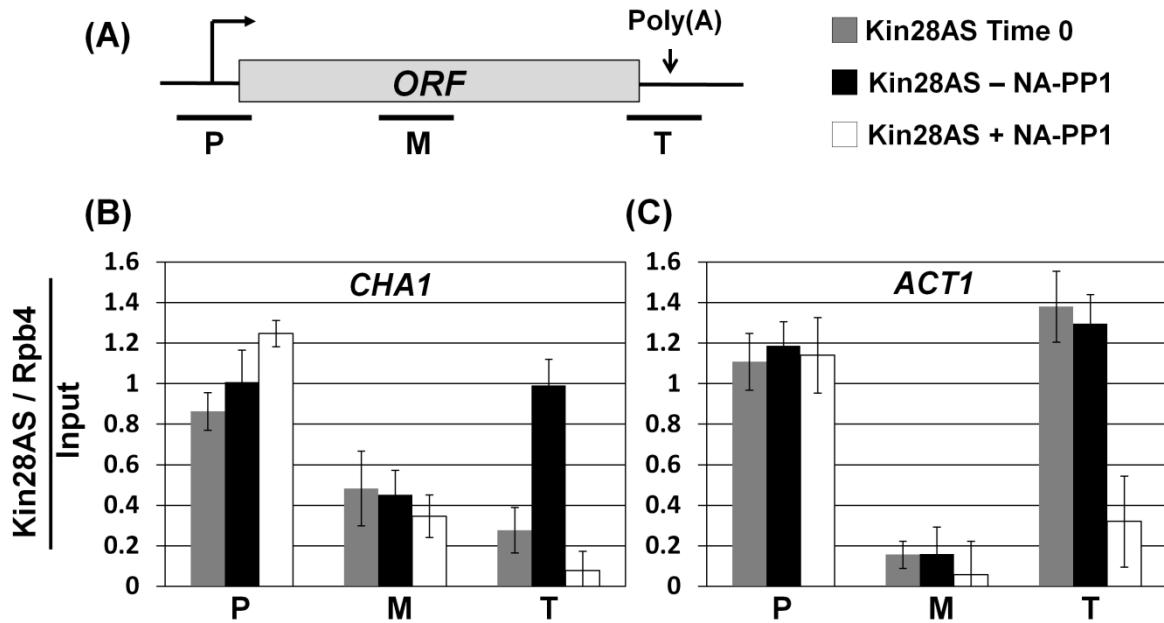

**Figure S4. Inhibition of Kin28 Kinase alters the ratio of Kin28/RNAPII at the terminator regions for *CHA1* and *ACT1* genes.** A, Schematic depiction of a gene indicating the position of the promoter (P), coding (M) and terminator (T) regions PCR amplified in the ChIP assay. B – C, Quantification of Kin28AS ChIP signals, shown in Fig. 3, normalized with Rpb4-Myc signals, shown in Fig. S3, in the kin28-as mutant in the absence of NA-PP1 (-NA-PP1) or in the presence of NA-PP1 (+NA-PP1). Input represents DNA prior to immunoprecipitation. Error bars represent one standard deviation.

## Supplemental Fig. S5

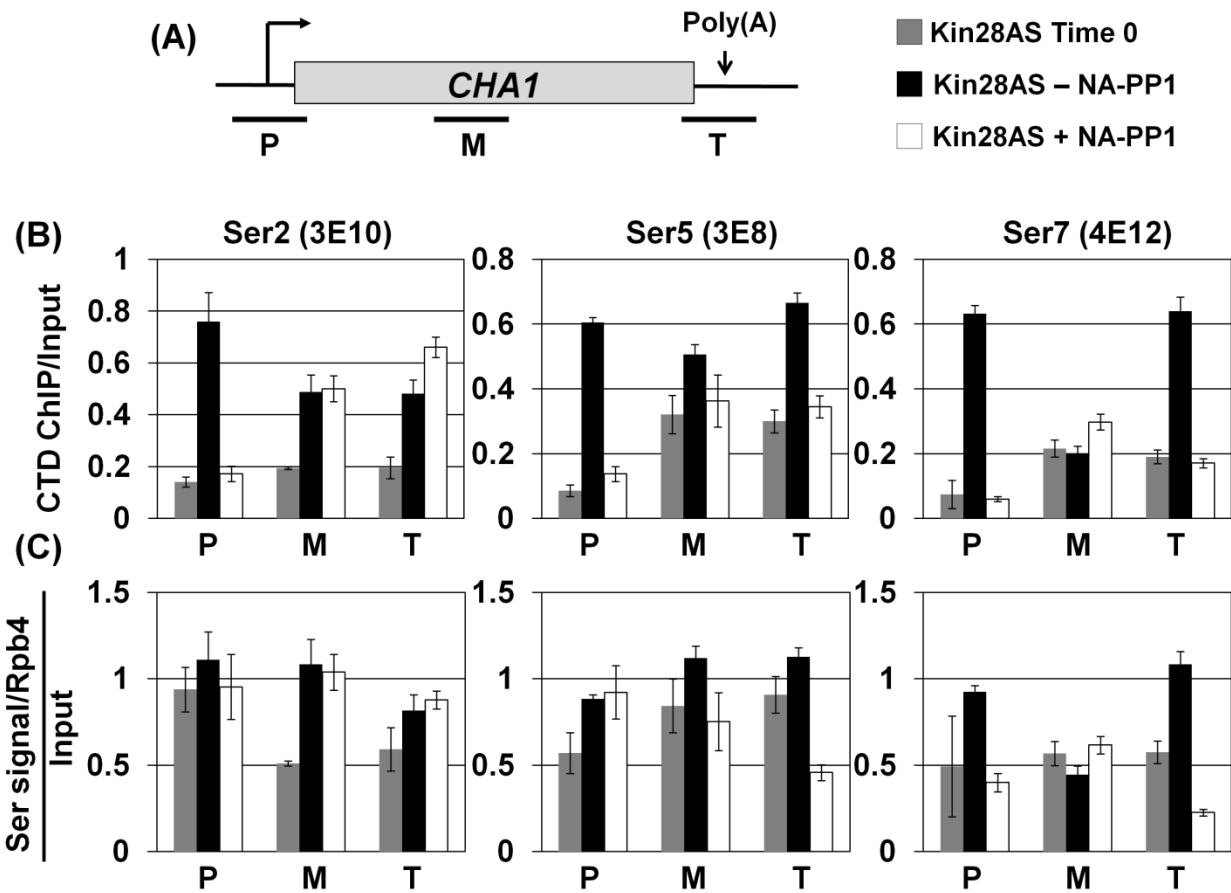

**Figure S5. Inhibition of Kin28 Kinase alters CTD phosphorylation pattern along *CHA1*.** A, Schematic depiction of a gene indicating the position of the promoter (P), coding (M) and terminator (T) regions PCR amplified in the ChIP assay. B, Quantification of ChIP signals for CTD-Ser2-P, CTD-Ser5-P and CTD-Ser7-P in kin28-as mutant in the absence of NA-PP1 (-NA-PP1) or in the presence of NA-PP1 (+NA-PP1). C, Quantification of ChIP signals for CTD-Ser2-P, CTD-Ser5-P and CTD-Ser7-P shown in panel B above, normalized with RNAPII signal obtained with Rpb4. Input represents DNA prior to immunoprecipitation. Error bars represent one standard deviation. The results shown here are averages of at least four PCR reactions from two independent chromatin preparations.

## Supplemental Fig. S6

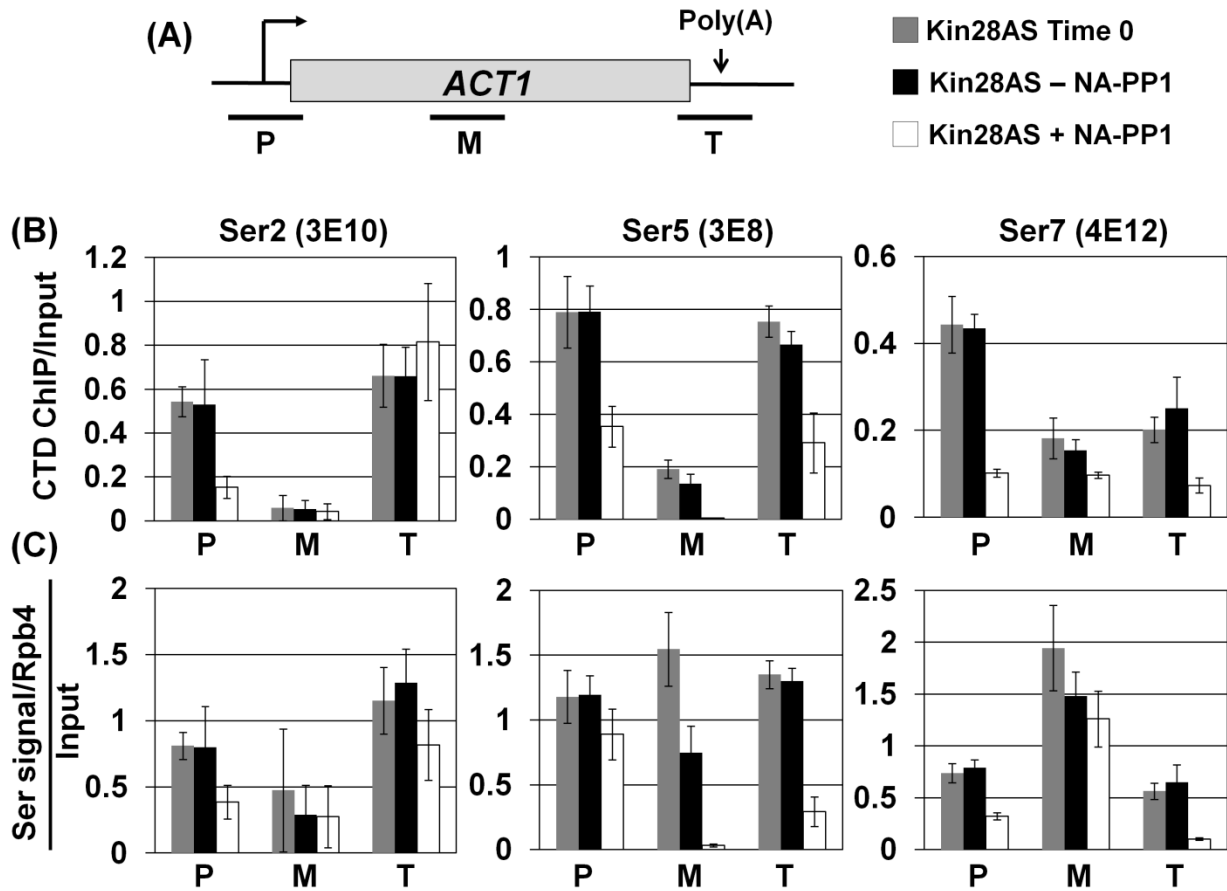

**Figure S6. Inhibition of Kin28 Kinase alters CTD phosphorylation pattern along *ACT1*.** A, Schematic depiction of a gene indicating the position of the promoter (P), coding (M) and terminator (T) regions PCR amplified in the ChIP assay. B, Quantification of ChIP signals for CTD-Ser2-P, CTD-Ser5-P and CTD-Ser7-P in kin28-as mutant in the absence of NA-PP1 (-NA-PP1) or in the presence of NA-PP1 (+NA-PP1). C, Quantification of ChIP signals for CTD-Ser2-P, CTD-Ser5-P and CTD-Ser7-P shown in panel B above normalized with RNAPII signal obtained with Rpb4. Input represents DNA prior to immunoprecipitation. Error bars represent one standard deviation. The results shown here are averages of at least four PCR reactions from two independent chromatin preparations.



## Supplemental Fig. S7

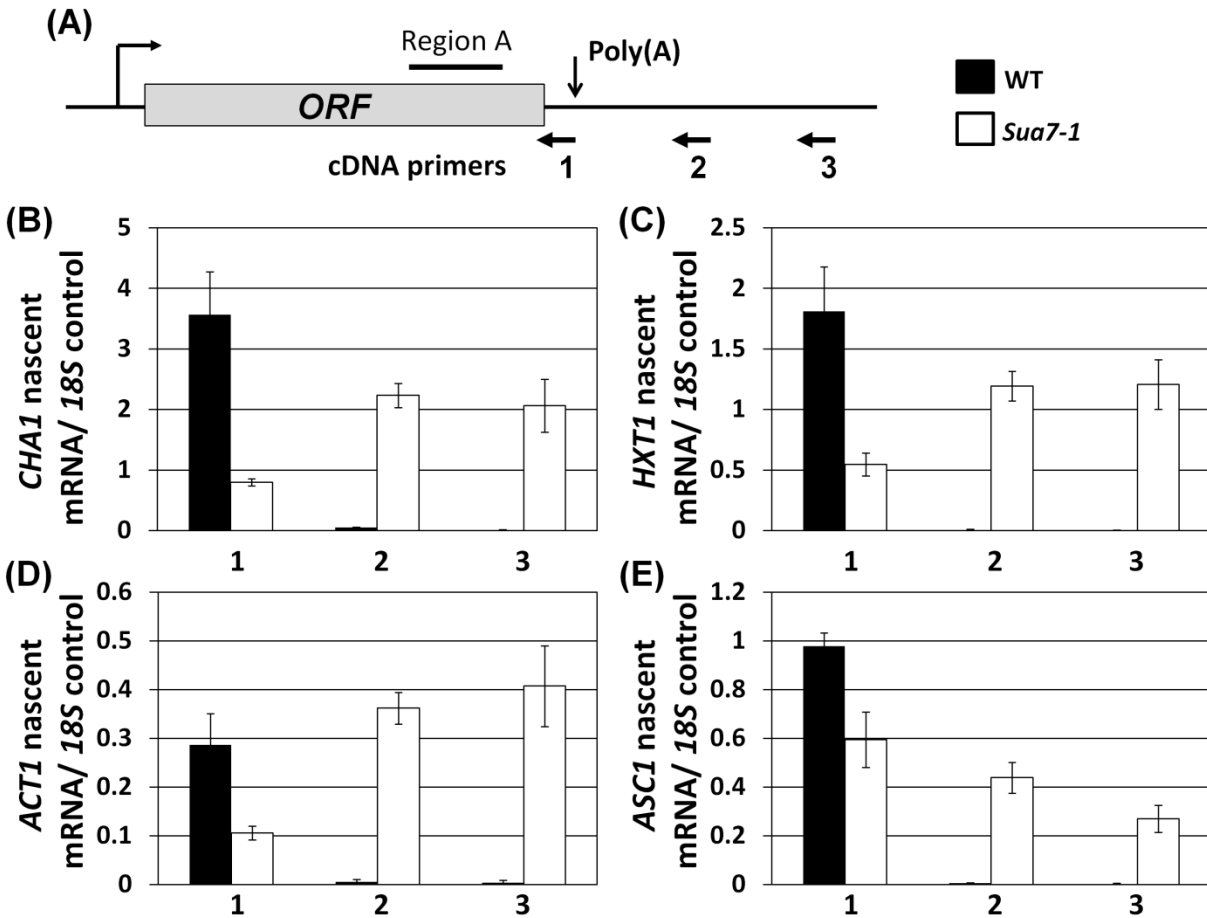

**Figure S7. The looping defective mutant of TFIIB, *sua7-1*, exhibits termination defect.** A, Schematic depiction of a gene showing the positions of three primers 1, 2 and 3 used for cDNA synthesis following TRO procedure. Region A represents the sequence amplified by PCR following cDNA synthesis. B – E, Quantification of RNA levels detected following TRO analysis of indicated genes in *sua7-1* mutant and the isogenic wild type strain. The transcript level of 18S was used as the control for normalization of results. Error bars represent one standard deviation. The results shown here are averages of at least four PCRs from two independent RNA preparations.

## Supplemental Fig. S8

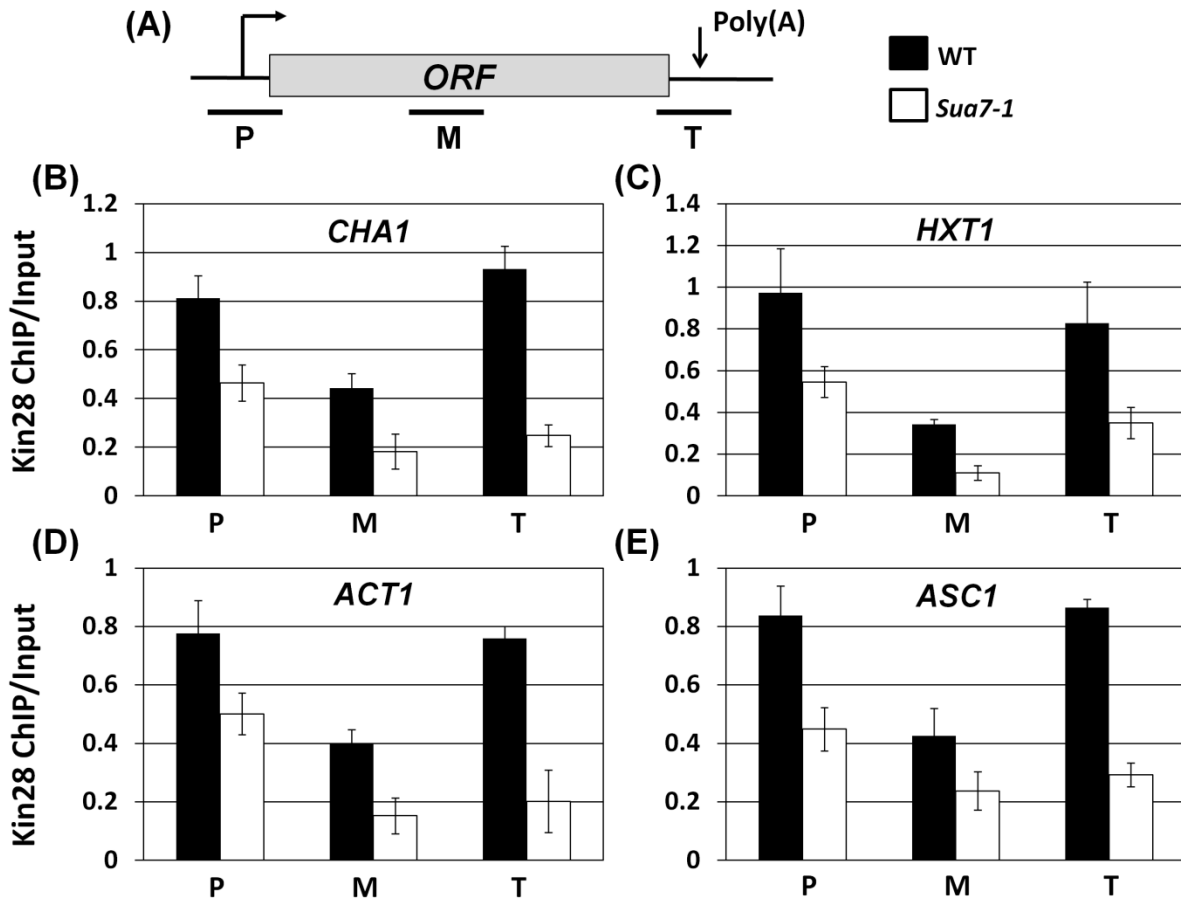

**Figure S8. The looping defective mutant of TFIIB, *sua7-1*, exhibits a loss of Kin28 on the terminator.** A, Schematic depiction of a gene indicating the position of the promoter (P), coding (M) and terminator (T) regions amplified by PCR in the ChIP assay. B – E, Quantification of ChIP signals showing crosslinking of Kin28 to different regions in wild type (WT) and mutant TFIIB (*sua7-1*) cells. Input represents DNA prior to immunoprecipitation. Error bars represent one unit of standard deviation. The results shown here are averages of at least four PCR reactions from two independent chromatin preparations.

## Supplemental Fig. S9

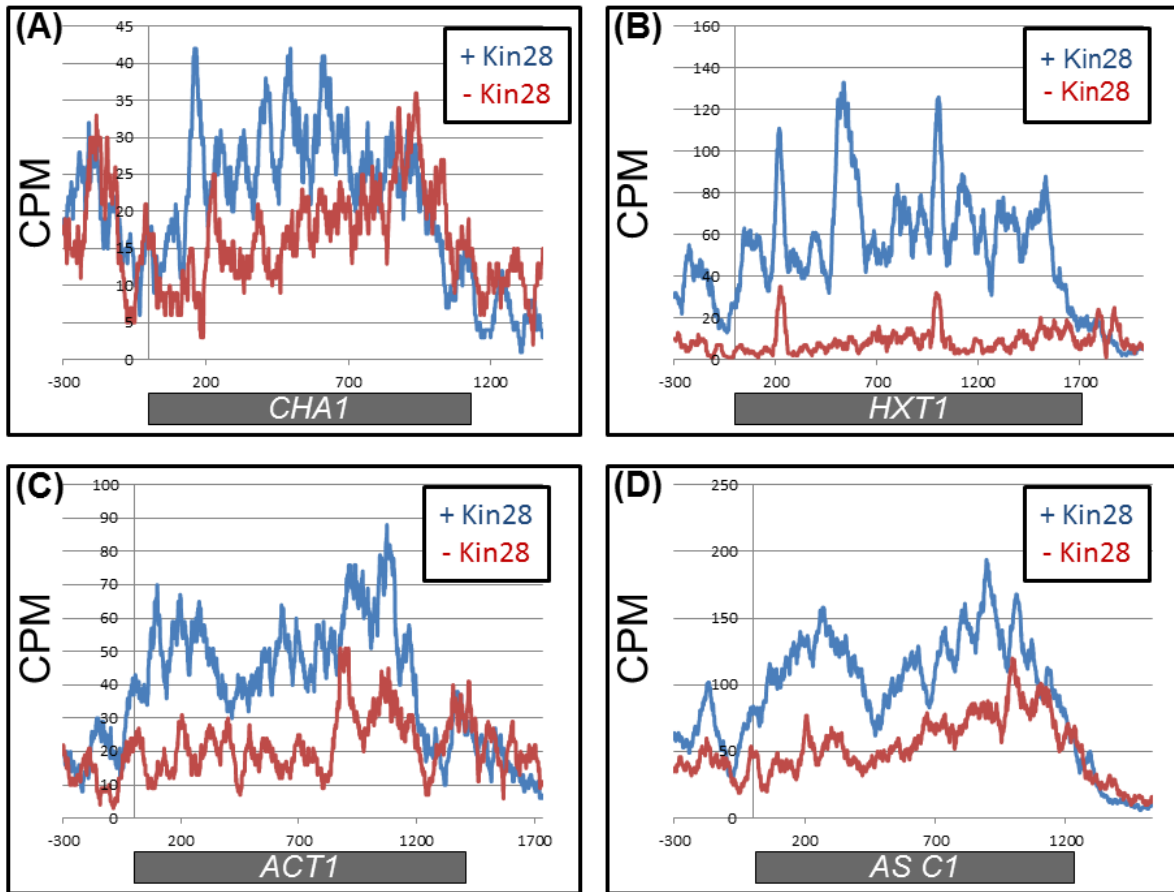

**Figure S9. Genomewide RNAPII ChIP-Seq analysis performed by Kevin Struhl's laboratory showed a decrease in the polymerase density in the coding region and an increase in the polymerase ChIP signal beyond the 3' end of *CHA1*, *HXT1*, *ACT1* and *ASC1* in the absence of Kin28 kinase activity.** RNAPII-density profile for *CHA1*, *HXT1*, *ACT1* and *ASC1* was extracted from the genomewide RNAP II ChIP-Seq data generated by Kevin Struhl's laboratory in the presence of Kin28 kinase (+Kin28) and upon depletion of Kin28 (-Kin28) from the nucleus by anchor away approach (Wong et al., 2014). The polymerase density profile for the four genes shown above is for the region encompassing the open reading frame (ORF), 300 bp upstream of ORF, and 300 bp downstream of the ORF. CPM is counts per million.

Supplemental Fig. S10

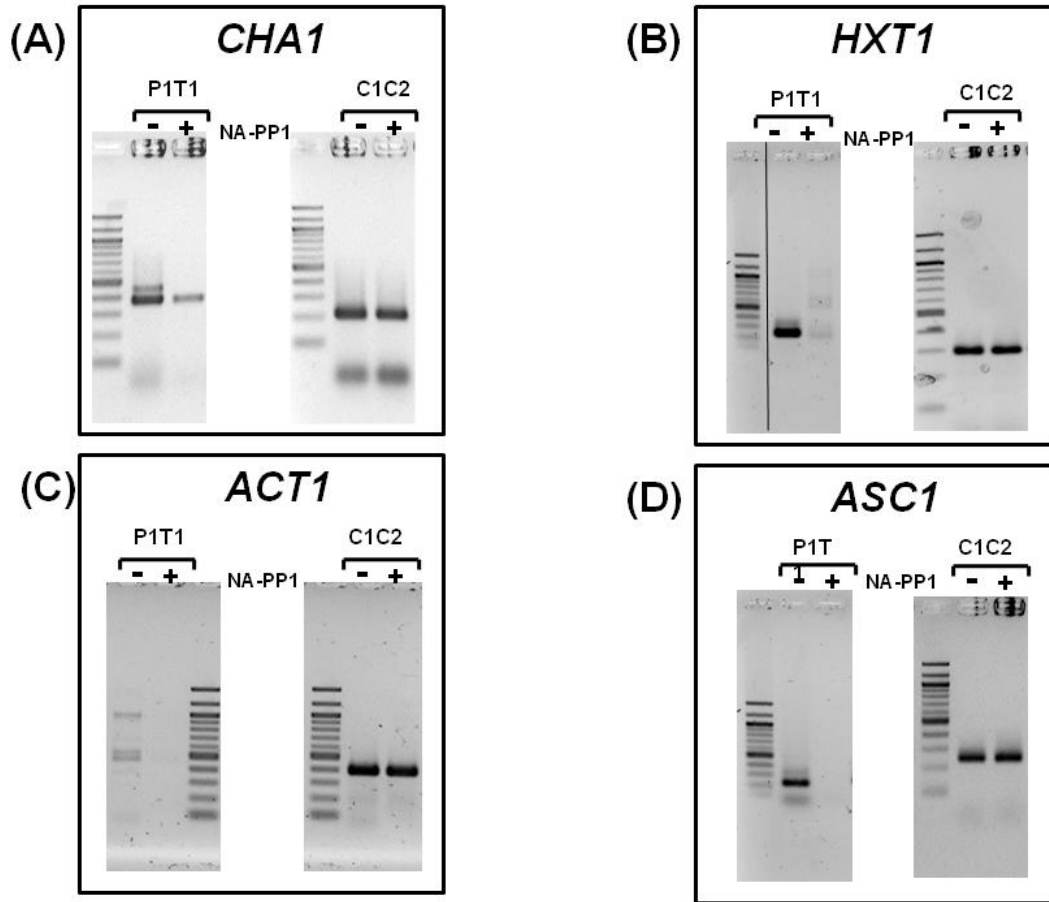

Figure S10. Full scan of gels shown in Fig. 5
